# Supplementary material for: Organic farming practices change the soil bacteria community, improving soil quality and maize crop yields
Source: PeerJ journal article supplement (doi:10.7717/peerj.11985), 2021-09-23
Supplement: Supplementary_figure_1.pdf [file Supplementary_figure_1.pdf]

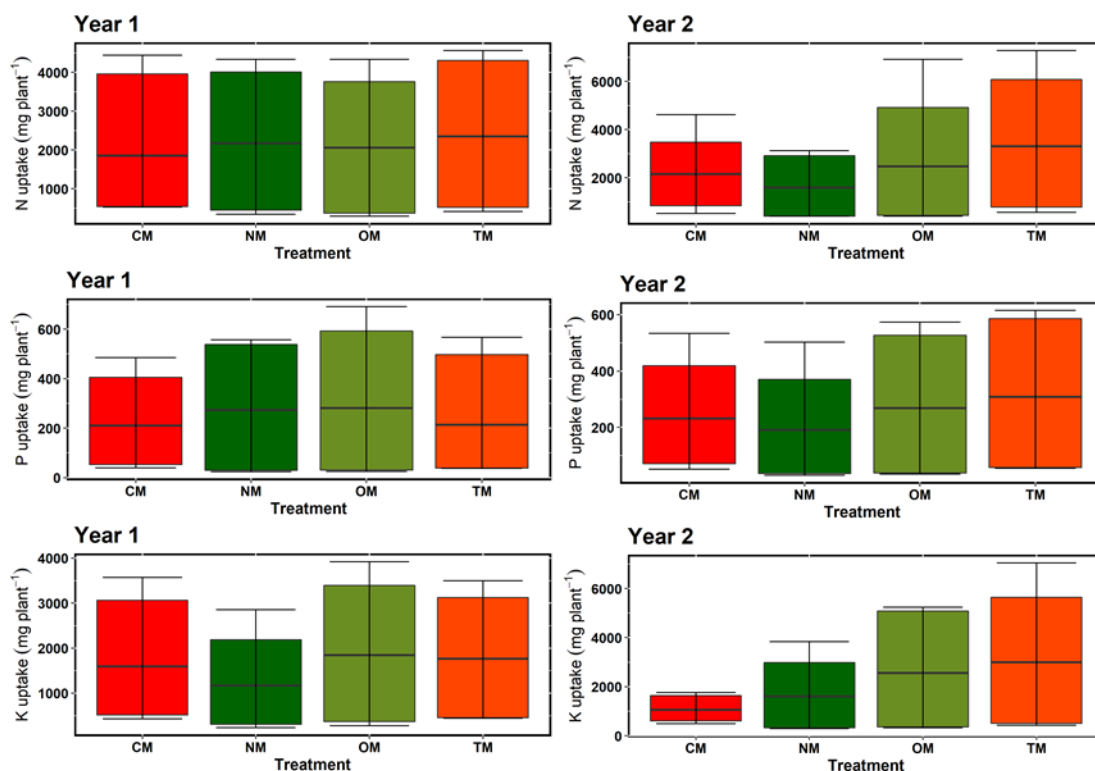

**Supplementary Figure 1 Boxplot of the nutrient uptake per plant.** The lower and upper box boundaries represent the 25th and 75th percentiles, respectively, the central line stands for the inside box median. CM: conventional management, TM: transition management, OM: organic management, NM: nature management.
