# Supplementary material for: Organic farming practices change the soil bacteria community, improving soil quality and maize crop yields
Source: PeerJ journal article supplement (doi:10.7717/peerj.11985), 2021-09-23
Supplement: Supplementary_figure_2.pdf [file Supplementary_figure_2.pdf]

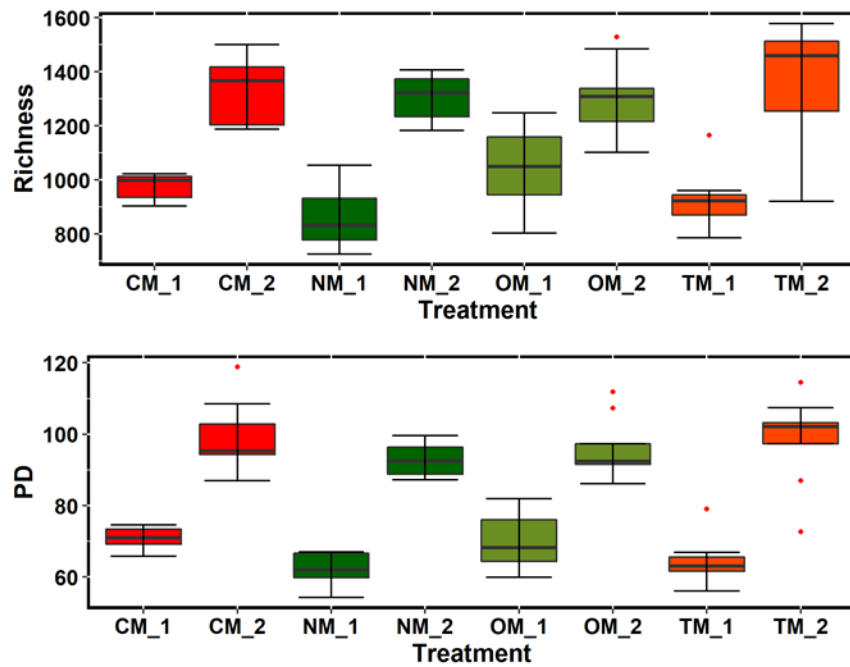

Supplementary Figure 2 Boxplot of the diversity indices. The lower and upper box boundaries represent the 25th and 75th percentiles, respectively, the central line stands for the inside box median. CM: conventional management, TM: transition management, OM: organic management, NM: natural management. \_1: Year 1, \_2: Year 2. PD is the Faith's phylogenetic diversity and Richness is the observed ASVs numbers. Red dots representing outliers.
